# TITLE

Uncovering clinical rehabilitation technology trends: field observations, mixed methods analysis, and data visualization

## AUTHORS

Courtney Celian, M/OT<sup>a</sup>, Hannah Redd PT, DPT<sup>a</sup>, Kevin Smaller, BS<sup>a</sup>, Partha Ryali, PhD<sup>a,b</sup>, James L. Patton, PhD<sup>a,b</sup>, David J. Reinkensmeyer, PhD<sup>c,d</sup>, Miriam R. Rafferty, PT, DPT, PhD<sup>a,e,f</sup>

<sup>a</sup> Shirley Ryan AbilityLab, Chicago, IL

<sup>b</sup> Department of Bioengineering, University of Illinois at Chicago, Chicago, IL

<sup>c</sup> Henry Samueli School of Engineering Department of Mechanical and Aerospace Engineering, University of California, Irvine, Irvine, CA

<sup>d</sup> UC Irvine School of Medicine Department of Anatomy and Neurobiology University of California, Irvine, Irvine, CA

<sup>e</sup> Northwestern University Feinberg School of Medicine Department of Physical Medicine and Rehabilitation, Chicago, IL

<sup>f</sup> Northwestern University Feinberg School of Medicine Department of Psychiatry and Behavioral Science University of Illinois Chicago, Chicago, IL

## ACKNOWLEDGEMENTS

We thank the clinical staff at the Shirley Ryan AbilityLab (SRALab) for allowing us to perform the field observations. We also thank the Robotics Lab and KTEAM at SRALab and the members of the STARS RERC and COMET-RERC.org for their ongoing comments and advice.

This study was presented as a poster at Progress in Clinical Motor Control II Movement and Rehabilitation Sciences conference at Northwestern University in Chicago, IL , on July 13<sup>th</sup>, 2023.

## FINANCIAL SUPPORT

This work was supported by the National Institute on Disability, Independent Living, and Rehabilitation Research [90REGE005, 90REGE0010], the National Institute on Aging [P30AG059988], U.S. Department of Defense [W81XWH-20-1-0231], and the National Center for Advancing Translational Sciences [UL1TROO1414]. These contents, however, do not necessarily represent the policy or endorsement of any of the funding sources.

## AUTHOR DISCLOSURES

David J. Reinkensmeyer has a financial interest in Hocoma A.G. and Flint Rehabilitation Devices LLC, companies that develop and sell rehabilitation devices. The terms of these arrangements have been reviewed and approved by the University of California, Irvine, in accordance with its conflict-of-interest policies.

All other authors declare no competing interests.

## CORRESPONDING AUTHOR

Miriam R. Rafferty, DPT, PhD  
355 E Erie St. (19<sup>th</sup> floor) Chicago, IL 60611  
[Mrafferty@sralab.org](mailto:Mrafferty@sralab.org)  
312-238-7233

## CLINICAL TRIAL REGISTRATION NUMBER

42 This study was conducted in accordance with ethical principles and guidelines and was  
43 approved by the Northwestern Institutional Review Board (STU00212079).

44

## TITLE

Uncovering clinical rehabilitation technology trends: field observations, mixed methods analysis, and data visualization.

## ABSTRACT

**Objective:** To analyze real-world rehabilitation technology (RT) use, with a view toward enhancing RT development and adoption.

**Design:** A convergent, mixed-methods study using direct field observations, semi-structured templates, and summative content analysis.

**Setting:** Ten neurorehabilitation units in a single health system.

**Participants:** 3 research clinicians (1OT, 2PTs) observed ~60 OTs and 70 PTs in inpatient; ~18 OTs and 30 PTs in outpatient.

**Interventions:** Not applicable

**Main Outcome Measures:** Characteristics of RT, time spent setting up and using RT, and clinician behaviors.

**Results:** 90 distinct devices across 15 different focus areas were inventoried. 329 RT-uses were documented over 44 hours with 42% of inventoried devices used. RT was used more during interventions (72%) than measurement (28%). Intervention devices used frequently were balance/gait (39%), strength/endurance (30%), and transfer/mobility training (16%). Measurement devices were frequently used to measure vitals (83%), followed by grip strength

(7%), and upper extremity function (5%). Device characteristics were predominately AC-powered (56%), actuated (57%), monitor-less (53%), multi-use (68%), and required little familiarization (57%). Set-up times were brief (mean  $\pm$  SD =  $3.8 \pm 4.21$  and  $0.8 \pm 1.3$  for intervention and measurement, respectively); more time was spent with intervention RT ( $25.6 \pm 15$ ) than measurement RT ( $7.3 \pm 11.2$ ). RT nearly always involved verbal instructions (72%) with clinicians providing more feedback on performance (59.7%) than on results (30%). Therapists' attention was split evenly between direct attention towards the patient during clinician treatment (49.7%) and completing other tasks such as documentation (50%).

**Conclusions:** Even in a tech-friendly hospital, majority of available RT were observed un-used, but identifying these usage patterns is crucial to predict eventual adoption of new designs from earlier stages of RT development. An interactive data visualization page supplement is provided to facilitate this study.

## KEY WORDS

Physical and Rehabilitation Medicine; Rehabilitation; Occupational Therapy; Physical Therapy; Technology; Diffusion of Innovation; Technology Transfer; Implementation Science; Observational Study; Empirical Research; Qualitative Research; Quantitative Research

## ABBREVIATIONS

Occupational Therapy (OT), Physical Therapy (PT), Rehabilitation Technology (RT)

## INTRODUCTION

Rehabilitation technology (RT)<sup>4</sup> is surprisingly under-used.<sup>5</sup> Despite the significant funding and years of multi-disciplinary efforts from researchers, developers, and clinicians; cutting-edge tools for individual with disabilities-- such as virtual reality,<sup>6</sup> robotics,<sup>7</sup> and wearable sensors<sup>8</sup>-- rarely see widespread clinical use. The persistent challenge in rehabilitation sciences lies in the disconnect between RT development and clinical use.<sup>5,8-13</sup> Traditionally, research has focused on efficacy and feasibility studies instead of the factors that influence real-world use of technologies in clinical practice.<sup>13-16</sup> Perhaps developers do not know enough about the end-stage of this adoption process, leaving a gap to explore the success or failure of effective RT in clinical practice.

To address this gap, we sought to understand the qualities of widely used technologies in clinical treatment, and the factors that facilitate or hinder RT-use. In previous studies, barriers and facilitators of RT into clinical practice have been explored primarily through self-reporting, including surveys,<sup>11,17,18</sup> interviews,<sup>11,17</sup> focus groups,<sup>5</sup> case studies,<sup>14</sup> and vignettes.<sup>19</sup> For example, clinicians provided vignettes describing RT-use decisions during treatment sessions, revealing that new RT is not seen as advantageous due to time and complexity.<sup>19</sup> While these self-reporting methods provide clarity into the implementation challenges and opportunities, they do not fully capture the clinical experience.

Field observations, a form of ethnographic research that uses participant observation to explore practices, provide valuable insights into the practical application of RT in real-world settings.<sup>20</sup> In the case of RT, it serves as a valuable tool for investigating trends, adoption, and

challenges of RT-use in clinical treatment, allowing us to identify commonly used equipment, quantify its use, and elucidate how it is used.

The goal of this manuscript is to enhance RT design and development by understanding observed usage patterns in clinical settings. We did this by observing clinical RT-use and inventorying RT available in inpatient and outpatient settings. We sought to describe (1) the characteristics of RT associated with therapist use; (2) how much time therapists spend using RT; and (3) therapists' behaviors surrounding RT-use. We intended to build on our previous vignette study, aiming to understand clinicians' on-the-spot decision-making regarding the use or non-use of RT.<sup>19</sup>

## METHODS

### Study Design

This study was conducted in accordance with ethical principles and guidelines, approved by the Northwestern Institutional Review Board (STU00212079) with a waiver of informed consent from observed patients or clinicians. Given the observational design of the study, no masking or randomization was used. Clinicians followed routine clinical practice with no added treatments or assessments. No patient information, protected health information, or identifiers were documented. The director of the allied health facility authorized all observations. A flyer containing information about the study was sent to the sites' managers via email to inform their team of the researchers' presence during observation days.

## Context and sample

The field observations and inventory were conducted in our rehabilitation health system, a flagship translational research hospital designated as a national rehabilitation innovation center.<sup>21</sup> Thus, there is ample RT in all clinical spaces increasing therapist access and opportunity for use. The health system includes adult inpatient treatment on 7 floors within the flagship hospital, 5 outpatient interdisciplinary DayRehab<sup>®</sup> sites, and 3 outpatient neurologic rehabilitation clinics. Data collection occurred in 10 patient units across 3 different settings: adult inpatient treatment floors (7 inpatient units), one DayRehab<sup>®</sup> site (2 units) located adjacent to the flagship hospital, and one outpatient site (1 unit) located within the flagship hospital building. The study observed approximately 70 Physical Therapists (PTs), 60 Occupational Therapists (OTs), and 35 Speech Language Pathologists (SLPs) employed at the inpatient rehabilitation facility; 13 PTs, 12 OTs, and 10 SLPs at the DayRehab<sup>®</sup> outpatient location; 17 PTs, 6 OTs, and 4 SLPs employed in outpatient neurologic rehabilitation clinic. Even though clinical treatment occurs in a variety of different areas around each setting (e.g., inpatient rooms, hospital hallways, private treatment rooms, and shared gym spaces) we contained the observations and inventory to only shared gym spaces.

## Data Collection

Two trained clinician research team members (CC, HR) made direct field observations<sup>2</sup> using a semi-structured template in Excel<sup>®</sup>, and inventoried each clinical treatment gym in all 10 patient units. This included a range of RT for gait (e.g., overhead gait tracks and treadmills), assessment tools (e.g., upper extremity assessment kits, dynamometers), and general rehab



equipment (e.g., adjustable mat table and parallel bars). We excluded simple items such as towels, canes, and walkers as they are used as tools in rehabilitation but not specifically designed as RT for therapists. Data collected in the field observations included descriptive (e.g., RT observed used, instructions given to patient), categorical (e.g., clinician type), and quantitative (e.g., time spent setting up RT) variables. Only descriptive variables (e.g., RT) were recorded in the inventory. Table 1 contains operational definitions and examples of all qualitative and quantitative data.

---

**\*\*INSERT TABLE 1 HERE\*\***

---

## Analysis

A convergent, mixed methods design<sup>1</sup> used conventional reporting guidelines.<sup>22</sup> Two coders (CC,HR) refined descriptive variables through inductive coding, communicated regularly to resolve discrepancies, and a third coder (MR) assisted in consensus building on the coding strategy. We used qualitative content analysis, using a summative approach,<sup>3</sup> to analyze the descriptive variables; this resulted in the creation of multiple subcategories under the different types of RT. We used descriptive statistics to analyze categorical data (e.g., clinician type, feedback type, etc.), representing the results through counts and percents. Data integration occurred through transforming qualitative data into quantitative, using content analysis.<sup>23</sup> We analyzed time quantitatively as a continuous variable measured in minutes. We analyzed and visualized data using Excel<sup>a</sup> and R software<sup>b</sup>, and used Python<sup>c</sup> for exploratory data analysis to

investigate the most prevalent combination of RT characteristics used during clinical treatment, and understand the plurality of RT.

## RESULTS

Three trained research clinicians (1 OT, and 2 PTs) completed field observations intermittently between January 2021 through September 2022. They observed for over 44 hours in 60 to 190-minute increments throughout the day until reaching data saturation (defined as the lack of new RT, or RT used in novel ways). The clinicians completed over 24 hours of observations in the inpatient setting, over 10 hours in DayRehab<sup>®</sup>, and over 9 hours completed in outpatient. In total, they observed 329 RT-uses. They did not observe SLPs using RT in the shared gym space; therefore, the analysis focuses on OTs and PTs.

Two trained research clinicians (1 OT, 1 PT) inventoried 286 RT across all settings; after resolving duplicates, the total inventory revealed 90 distinct devices across 15 different focus areas, with 42% (n=38) observed used (supplemental Table 1). Of all inventoried devices, 21% (n=19) were categorized as gait and/or balance focused, with 36% (n=7) observed used; 13% were for strengthening and/or endurance (n=12), with 75% (n=9) observed used. There are 6 device focus categories in which there are only 1 or 2 device models in the inventory (e.g., vitals, cognition). See supplementary information for a link to an interactive Sankey Diagram that explores the relationships between the inventoried devices.

## Field Observations

Inductive coding of the field observations revealed two RT-use activities: intervention and measurement. Intervention involves actions by clinicians to create, promote, restore, maintain, or modify function, while measurement assesses initial performance or outcomes.<sup>24</sup> Table 2 details categories and subcategories of observed RT, with counts and percentages. Supplementary materials include an interactive pie chart and Sankey diagram illustrating the proportion of RT characteristics in intervention and measurement RT from the field observations (supplemental Sankey diagram 1).

---

**\*\*INSERT TABLE 2 HERE\*\***

---

Seventy-two percent of observed RT-use (n=237) were for interventions. Most of these observed intervention RT had alternating current (AC) power (183, 78%), actuation (185, 78%), no monitor (162, 68%), multi-use (222, 94%), and required a short training period (1-2 hours) for clinicians to establish competence (111, 47%). We observed PTs (173, 73%) using RT for interventions more than OTs (n=56, 24%). These devices saw the most use during one-on-one treatments (169, 71%). The most common type of intervention RT was balance and/or gait (n=93, 39%) followed by strength and/or endurance training (n=70, 30%; fig. 1).

---

**\*INSERT FIGURE 1 HERE\***

---

Measurement RT accounted for 28% (n=92) of observed RT-use. Most of these observed measurement RT were battery-powered (81, 88%), unactuated (91, 99%), had a monitor (81,

88%), had a single-use (90, 98%), and required only entry-level training (knowledge acquired in OT and PT school) (78,85%) -- this was because vitals (76, 83%) was the most common measurement type. We observed PTs (73,79%) using RT for measurement more than OTs (14,15%). The second most common measurement type was grip strength (6, 7%) followed by upper extremity function (5, 5%; fig. 2), both performed exclusively by OTs.

---

*\*INSERT FIGURE 2 HERE\**

---

## Exploratory Data Analysis

We conducted exploratory data analysis to identify prevalent combinations of RT characteristics. We excluded non-novel RT, like the adjustable mat table (49, 15%) and adjustable parallel bars (24, 7%), to prevent bias.

For intervention RT, the dominant combination of characteristics included AC power, actuation, no display monitor, multi-use, requiring short training for competency, used during interventions targeting balance and/or gait, and used by PTs (40, 24%). These include body weight supported treadmills (n=38), overhead gait tracks with electric harness (n=2), and ceiling lifts (n=1). Excluding these, the second most common combination included unpowered, unactuated, no display monitor, multi-use, requiring short training for competency, used during interventions targeting balance and/or gait, and used by PTs (18,11%). The only devices in this category were manual over-head gait tracks (n=18).

For measurement RT, the dominant combination of characteristics included battery power, no actuation, with display monitor, tailored for single-use purpose, necessitating entry-level

competency, and used by PTs (70, 97%). But vital signs monitoring machines accounted for all instances of the indicated measurement characteristics. Excluding vital signs, the dominant combination shifted to unpowered, unactuated, no monitor, tailored for single-use purpose, required short training for competency, and used by OTs (6,40%). These instances encompassed kits assessing upper extremity function, manual dexterity, and pinch/grip strength.

## Time

Figure 3 displays setup and total time spent with RT. Setup time was skewed, with a median of 1.2 minutes and a mean of  $2.9 \pm 4.3$  minutes. 84% of observations were of RT that took less than 5 minutes to setup, and 47% of RT took less than 1 minute to setup. In 5.4% of the observations, OTs and PTs used RT that took 10-36 minutes to set up. The RT that took the longest setup time were a mobile arm support that a patient purchased, and a clinician installed on the patient's wheelchair (36 minutes), and an exoskeleton device (32 minutes). The average total time spent with RT (including setup and breakdown) was  $20.5 \pm 16.3$  minutes. Clinicians spent more time setting up and using intervention RT (setup mean  $3.8 \pm 4.21$  minutes; total time mean  $25.6 \pm 15$  minutes) compared to measurement RT (setup mean  $0.8 \pm 1.3$  minutes; total time mean  $7.3 \pm 11.2$  minutes).

---

*\*INSERT FIGURE 3 HERE\**

---

## Therapists' Behaviors

We investigated clinicians' instructions and patients' experience levels with RT. Predominately, therapists used verbal instructions (313, 72%) when using RT, followed by a combination of verbal and demonstrated instruction (46, 14%). Most patients were repeated RT users (294, 89%) rather than first-time users (35, 10.6%). First-time users received verbal instructions or a mix of verbal and physical instruction (e.g., demonstration, physical cues, physical assistance). Among the patients with no instructions (16, 4.9%) all were repeat users, using vitals machines or exercise equipment.

We documented clinicians' feedback types as either knowledge of performance (task quality or movement patterns), or knowledge of results (outcomes), based on a commonly-used distinction in motor learning research.<sup>25-27</sup> Instances of no feedback were rare (4, 1.2%). Clinicians primarily provided knowledge of performance (197, 59.7%) compared to knowledge of results (99, 30%) or a combination of both (30, 9%).

Our findings revealed that clinicians were evenly divided between providing one-on-one direct attention (164, 49.7%) and multi-tasking (166, 50.3%) when treating patients with RT.

## DISCUSSION

We aimed to understand RT usage patterns such as the characteristics of RT, time spent on setup and total use, and therapists' behaviors.

## Rehabilitation Technology Characteristics

Clinicians embraced smart, actuated (185, 78%), and AC-powered (183, 77%) intervention RT, often observed during balance and/or gait training (93, 39%), including body weight supported treadmills (n=38), used by physical therapists (173, 73%). The preference may stem from the safety and efficacy benefits of body weight support technology in gait training.<sup>15</sup>

The inventory revealed a diverse range of RT for balance and/or gait training, but fewer than half were observed in used. Despite evidence to support split-belt treadmill training,<sup>28,29</sup> and emerging research advocating for exoskeletons,<sup>30</sup> both devices were rarely observed in use. The “relative advantage” barrier, identified in our previous work, persists as there is no clear advantage of novel RT over existing alternatives,<sup>19,31</sup> and clinicians favor familiar devices such as body-weight supported treadmills and over-head gait tracks due to their proven effectiveness. This preference is mirrored in the hospital system, with each inpatient floor and setting equipped with at least one body weight supported treadmill and gait track; split-belt treadmills and exoskeletons are limited to 1-2 in the entire system. This highlights the need for developers of RT to align their devices with clinician practices, workflow, and practice guidelines. Novel RT needs to demonstrate a clear benefit over the existing equipment.

While intervention RT outnumbered measurement RT, more measurement devices in the inventory were observed in use with the most used measurement RT being vital machines and grip strength dynamometers. Vitals measurement is essential for PTs to monitor patient safety in all conditions, and aerobic intervention efficacy; plus, they are faster and more accurate than taking manual measurements.<sup>32</sup> Grip strength dynamometers are easy to use, provide more

precise measurement than the alternative manual muscle testing, and have established psychometric properties in nearly all conditions.<sup>33,34</sup> Two important features of these successful measurement RT are their adaptability to different populations and their relative advantage over prior gold standard measures of the vitals and strength domains.<sup>31</sup> Developers are likely to succeed by enhancing precision in current clinical metrics, instead of expending resources on the creation of novel measurement criteria.

### Time Constraints

Observed RT typically requires less than a day's worth of additional training, and clinicians did not invest a lot of time in setting up RT. This aligns with our earlier work: the time it takes to learn and set up RT is an important factor in its uptake.<sup>19</sup> Clinicians exhibit a stronger preference for RT that is integrated into their entry-level academic training,<sup>19</sup> and constraints on learning during work hours, coupled with the desire to optimize patient treatment time, discourage extensive setup.<sup>13</sup> We advise developers to consider training and setup time in RT development, even for devices with high efficacy and effectiveness. While greater efficacy might encourage more time investment, our field observations offer a benchmark for designing user-friendly RT.

### Therapists' Behaviors

Feedback plays a crucial role in motor learning, and clinicians' choice of feedback can influence how much patients learn.<sup>25</sup> Our observations revealed a preference among clinicians for providing knowledge of performance rather than knowledge of results when using RT. These findings align with current stroke research suggesting that knowledge of performance results in



superior motor learning compared to knowledge of results<sup>26,27</sup> and highlight therapists' attention to movement quality. Future research should investigate if clinician feedback type differs in the presence or absence of RT, or examine the correlation of specific types of feedback (directed vs guided cuing) on patient outcomes. Ultimately, personalized feedback types and frequencies may be necessary based on the patient's condition.<sup>27</sup>

Adhering to documentation standards dictated by insurance and legal requirements<sup>35,36</sup> often imposes an administrative burden contributing to clinician burnout.<sup>37</sup> Allowing patients to independently work with a device under clinical oversight provides therapists with valuable hands-free moments for efficient documentation. Our observations indicate no clear preference towards multi-tasking during RT use, suggesting potential RT solutions that facilitate engaging with patients or multi-tasking between other administrative demands and patient care.

## Study Limitations

Interpretations of the results can serve different purposes: they can reveal characteristics of RT associated with common use, which might guide RT designers, or highlight potential biases associated with lack of use, which might inform implementation innovators. Restricting our data collection to only the treatment gyms is a limitation, since there are devices located in managers' offices, patient rooms, and on research floors. This leads to underreporting of RT-use during clinical treatment and limits the scope of the RT inventory. The 90 available technologies in the inventory are likely larger than many smaller rehabilitation settings but were still insufficient in size for advanced statistical modeling. We based the categorization of RT on

observed use rather than the inventory, which has the potential of introducing bias. It is important to note that we completed our RT categorization at one organization, and it is not exhaustive; thus, it may not encompass the full spectrum of clinical treatment. Finally, our reliance on observation with little interactions with the clinicians makes it difficult to extrapolate the underlying reasons for specific clinical behaviors. These limitations highlight the need for further research on motivations behind RT choices within the health system.

## CONCLUSIONS

This mixed methods field observation study in a technology-focused hospital revealed that majority of available RT was not observed used. We observed intervention RT used twice as frequently as measurement RT, with a focus on gait/balance training and strengthening. The measurement RT that is used is primarily for vitals followed by grip strength. These results highlight the ongoing struggle to integrate new RT in clinical practice: successful cases are rare and involve well-established technologies like treadmills, exercise bicycles, and grip strength sensors. The limited use of technology for measurement is notable. Also, used RT tend to have brief set-up times (less than 4 minutes), and, when using them, clinicians typically provide a lot of feedback, focusing on performance (e.g., movement quality) rather than results. In about half of use cases, clinicians leverage the time the patient is interacting with technology to work on documentation.

## REFERENCES

1. Creswell JW, Plano Clark VL. *Designing and conducting mixed methods research*. Third Edition. ed. SAGE; 2018:xxvii, 492 pages.
2. Fix GM, Kim B, Ruben MA, McCullough MB. Direct observation methods: a practical guide for health researchers. *PEC Innovation*. December 2022;1(100036)doi:10.1016/j.pecinn.2022.100036
3. Hsieh HF, Shannon SE. Three approaches to qualitative content analysis. *Qual Health Res*. Nov 2005;15(9):1277-1288. doi:10.1177/1049732305276687
4. Rehabilitation Act. Amended 2015, 29 U.S.Code 32 §705 (1973).
5. Mitchell J, Shirota C, Clanchy K. Factors that influence the adoption of rehabilitation technologies: a multi-disciplinary qualitative exploration. *Journal of Neuroengineering and Rehabilitation*. Jun 20 2023;20(1)doi:ARTN 80 10.1186/s12984-023-01194-9
6. Cano Porras D, Sharon H, Inzelberg R, Ziv-Ner Y, Zeilig G, Plotnik M. Advanced virtual reality-based rehabilitation of balance and gait in clinical practice. *Ther Adv Chronic Dis*. 2019;10:2040622319868379. doi:10.1177/2040622319868379
7. Reinkensmeyer DJ. JNER at 15 years: analysis of the state of neuroengineering and rehabilitation. *J Neuroeng Rehabil*. Oct 30 2019;16(1):144. doi:10.1186/s12984-019-0610-0
8. Lang CE, Barth J, Holleran CL, Konrad JD, Bland MD. Implementation of Wearable Sensing Technology for Movement: Pushing Forward into the Routine Physical Rehabilitation Care Field. *Sensors-Basel*. Oct 2020;20(20)doi:ARTN 5744

359 10.3390/s20205744

360 9. Louie DR, Bird ML, Menon C, Eng JJ. Perspectives on the prospective development of  
361 stroke-specific lower extremity wearable monitoring technology: a qualitative focus group  
362 study with physical therapists and individuals with stroke. *Journal of Neuroengineering and*  
363 *Rehabilitation*. Feb 25 2020;17(1)doi:ARTN 31

364 10.1186/s12984-020-00666-6

365 10. Lin DJ, Finklestein SP, Cramer SC. New Directions in Treatments Targeting Stroke  
366 Recovery. *Stroke*. Dec 2018;49(12):3107-3114. doi:10.1161/Strokeaha.118.021359

367 11. Postol N, Barton J, Wakely L, Bivard A, Spratt NJ, Marquez J. "Are we there yet?"  
368 expectations and experiences with lower limb robotic exoskeletons: a qualitative evaluation of  
369 the therapist perspective. *Disabil Rehabil*. Mar 1 2023;doi:10.1080/09638288.2023.2183992

370 12. Lenfant C. Shattuck lecture--clinical research to clinical practice--lost in translation? *N*  
371 *Engl J Med*. Aug 28 2003;349(9):868-74. doi:10.1056/NEJMsa035507

372 13. Bauer MS, Damschroder L, Hagedorn H, Smith J, Kilbourne AM. An introduction to  
373 implementation science for the non-specialist. *BMC Psychol*. Sep 16 2015;3(1):32.  
374 doi:10.1186/s40359-015-0089-9

375 14. Lane JP, Leahy JA, Bauer SM. Accomplishing technology transfer: case-based lessons of  
376 what works and what does not. *Assist Technol*. Summer 2003;15(1):69-88.  
377 doi:10.1080/10400435.2003.10131891

378 15. Lane JP. Understanding Technology Transfer. *Assist Technol*. 1999;11(1):5-19.  
379 doi:10.1080/10400435.1999.10131981

16. Lane JP, Flagg JL. Translating three states of knowledge--discovery, invention, and innovation. *Implement Sci.* Feb 1 2010;5:9. doi:10.1186/1748-5908-5-9
17. Liu LL, Cruz AM, Rincon AR, Buttar V, Ranson Q, Goertzen D. What factors determine therapists' acceptance of new technologies for rehabilitation - a study using the Unified Theory of Acceptance and Use of Technology (UTAUT). *Disabil Rehabil.* 2015;37(5):447-455. doi:10.3109/09638288.2014.923529
18. Hughes AM, Burridge JH, Demain SH, et al. Translation of evidence-based Assistive Technologies into stroke rehabilitation: users' perceptions of the barriers and opportunities. *Bmc Health Serv Res.* Mar 12 2014;14doi:ArtN 124 10.1186/1472-6963-14-124
19. Celian C, Swanson V, Shah M, et al. A day in the life: a qualitative study of clinical decision-making and uptake of neurorehabilitation technology. *J Neuroeng Rehabil.* Jul 28 2021;18(1):121. doi:10.1186/s12984-021-00911-6
20. Savage J. Ethnography and health care. *BMJ.* Dec 2 2000;321(7273):1400-2. doi:10.1136/bmj.321.7273.1400
21. A bill to amend title XVIII of the Social Security Act to preserve access to rehabilitation innovation centers under the Medicare program., 2834, Senate, 117th Congress sess (2023). 01/05/2023. <https://www.congress.gov/bill/117th-congress/senate-bill/2834>
22. Lee SD, Iott B, Banaszak-Holl J, et al. Application of Mixed Methods in Health Services Management Research: A Systematic Review. *Med Care Res Rev.* Jun 2022;79(3):331-344. doi:10.1177/10775587211030393

23. Fethers MD, Rubinstein EB. The 3 Cs of Content, Context, and Concepts: A Practical Approach to Recording Unstructured Field Observations. *Ann Fam Med*. Nov 2019;17(6):554-560. doi:10.1370/afm.2453
24. Occupational Therapy Practice Framework: Domain and Process-Fourth Edition. *Am J Occup Ther*. Aug 1 2020;74(Supplement\_2):7412410010p1-7412410010p87. doi:10.5014/ajot.2020.74S2001
25. Maier M, Ballester BR, Verschure P. Principles of Neurorehabilitation After Stroke Based on Motor Learning and Brain Plasticity Mechanisms. *Front Syst Neurosci*. 2019;13:74. doi:10.3389/fnsys.2019.00074
26. Subramanian SK, Massie CL, Malcolm MP, Levin MF. Does Provision of Extrinsic Feedback Result in Improved Motor Learning in the Upper Limb Poststroke? A Systematic Review of the Evidence. *Neurorehab Neural Re*. Feb 2010;24(2):113-124. doi:10.1177/1545968309349941
27. Levin MF, Demers M. Motor learning in neurological rehabilitation. *Disabil Rehabil*. Dec 2021;43(24):3445-3453. doi:10.1080/09638288.2020.1752317
28. Reisman DS, McLean H, Keller J, Danks KA, Bastian AJ. Repeated split-belt treadmill training improves poststroke step length asymmetry. *Neurorehabil Neural Repair*. Jun 2013;27(5):460-8. doi:10.1177/1545968312474118
29. Seuthe J, D'Cruz N, Ginis P, et al. Split-belt treadmill walking in patients with Parkinson's disease: A systematic review. *Gait Posture*. Mar 2019;69:187-194. doi:10.1016/j.gaitpost.2019.01.032

- 422 30. Hohl K, Giffhorn M, Jackson S, Jayaraman A. A framework for clinical utilization of  
423 robotic exoskeletons in rehabilitation. *J Neuroeng Rehabil.* Oct 29 2022;19(1):115.  
424 doi:10.1186/s12984-022-01083-7
- 425 31. Damschroder LJ, Reardon CM, Widerquist MAO, Lowery J. The updated Consolidated  
426 Framework for Implementation Research based on user feedback. *Implement Sci.* Oct 29  
427 2022;17(1):75. doi:10.1186/s13012-022-01245-0
- 428 32. Myers MG, Godwin M, Dawes M, et al. Conventional versus automated measurement of  
429 blood pressure in primary care patients with systolic hypertension: randomised parallel design  
430 controlled trial. *BMJ.* Feb 7 2011;342:d286. doi:10.1136/bmj.d286
- 431 33. Ekstrand E, Lexell J, Brogardh C. Grip strength is a representative measure of muscle  
432 weakness in the upper extremity after stroke. *Top Stroke Rehabil.* Dec 2016;23(6):400-405.  
433 doi:10.1080/10749357.2016.1168591
- 434 34. Peterson MD, Collins S, Meier HCS, Brahmsteadt A, Faul JD. Grip strength is inversely  
435 associated with DNA methylation age acceleration. *J Cachexia Sarcopeni.* Feb 2023;14:108-115.  
436 doi:10.1002/jcsm.13110
- 437 35. Guidelines for Documentation of Occupational Therapy. *Am J Occup Ther.* Nov/Dec  
438 2018;72(Supplement\_2):7212410010p1-7212410010p7. doi:10.5014/ajot.2018.72S203
- 439 36. Revised by the Commission on P, Casto SC, Davis C, et al. Standards of Practice for  
440 Occupational Therapy. *Am J Occup Ther.* Nov 1  
441 2022;75(Supplement\_3)doi:10.5014/ajot.2021.75S3004
- 442 37. Association APT. The Impact of Administrative Burden on Physical Therapist Services.  
443 Infographic. 2023. <https://www.apta.org/advocacy/issues/administrative-burden/infographic>

444     **SUPPLIERS**

445     a. Excel spreadsheet by Microsoft.

446     b. R Statistical Software; R Foundation for Statistical Computing.

447     c. Python Software Foundation (Libraries Used: Pandas).

448



449 FIGURE LEGENDS

450 **Figure 1: Intervention RT (n=237) subcategories.** Devices for balance and gait (n=93, 39%) were the  
 451 most common interventions observed, followed by devices for strengthening and/or endurance (n=70,  
 452 30%), and transfers and/or mobility (n=37, 16%).

453 **Figure 2: Measurement RT (n=92) subcategories.** Vitals (n=76, 83%) dominated the observed  
 454 measurements, followed by grip strength (n=6, 7%) and upper extremity function (n=5, 5%).

455 **Figure 3: Setup time (panel A) and total time (panel B) spent with RT devices among OTs and PTs**  
 456 **during observed sessions.** More time is spent setting up and using RT for intervention than  
 457 measurement (\*p<0.001).

458

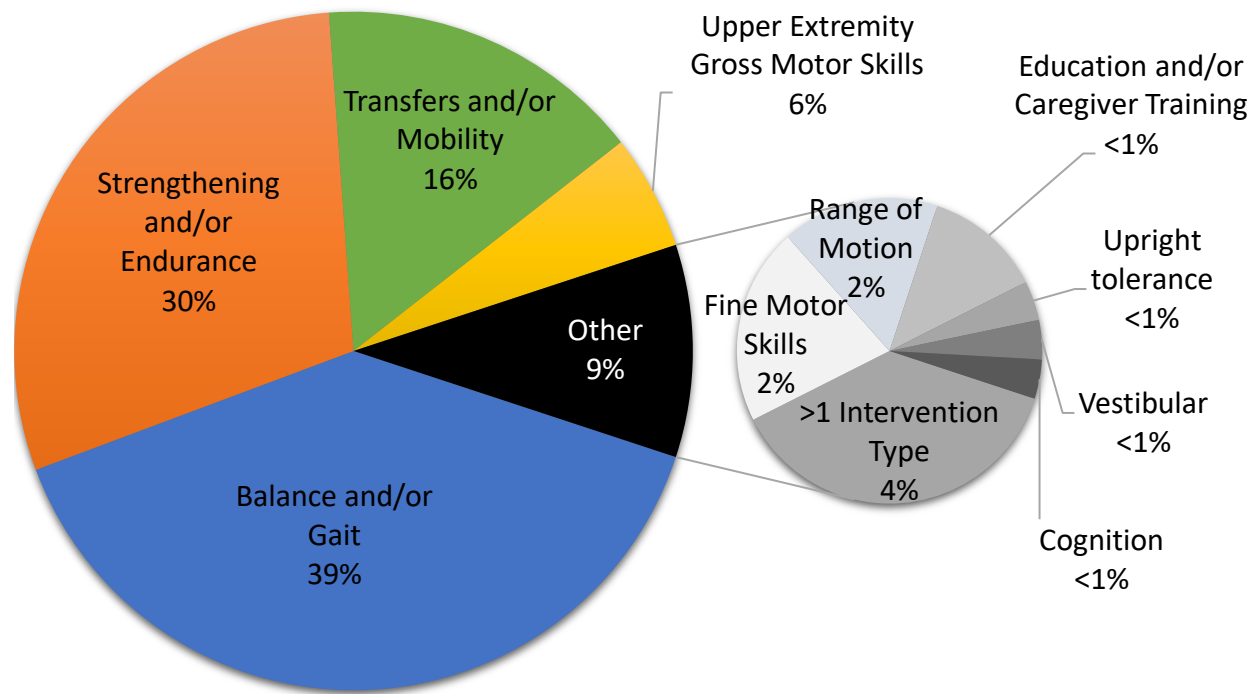

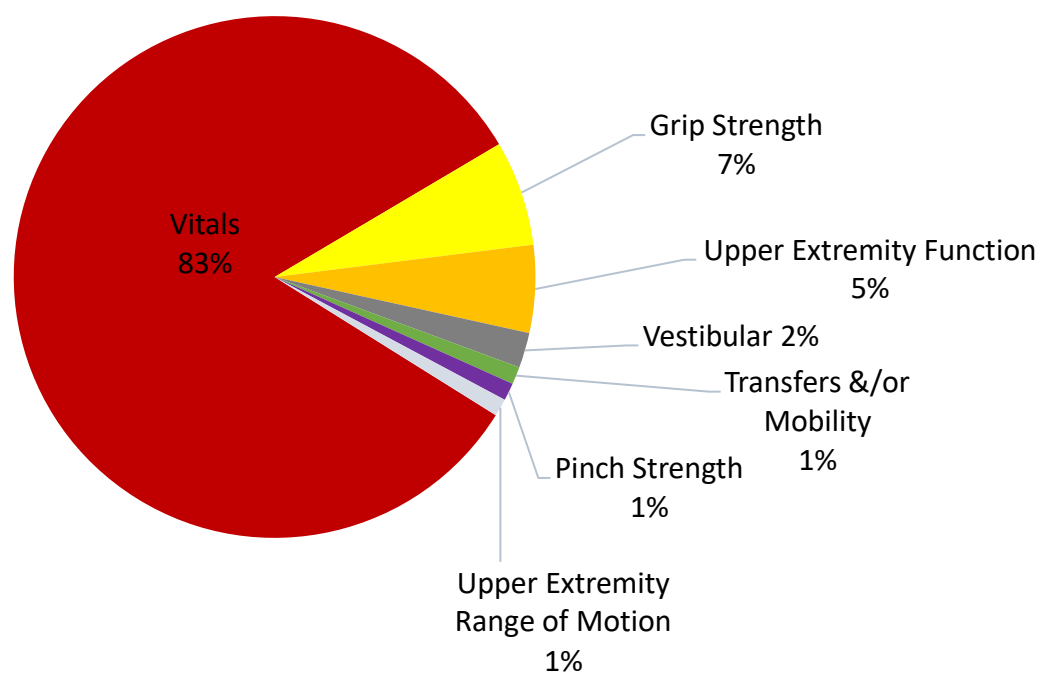

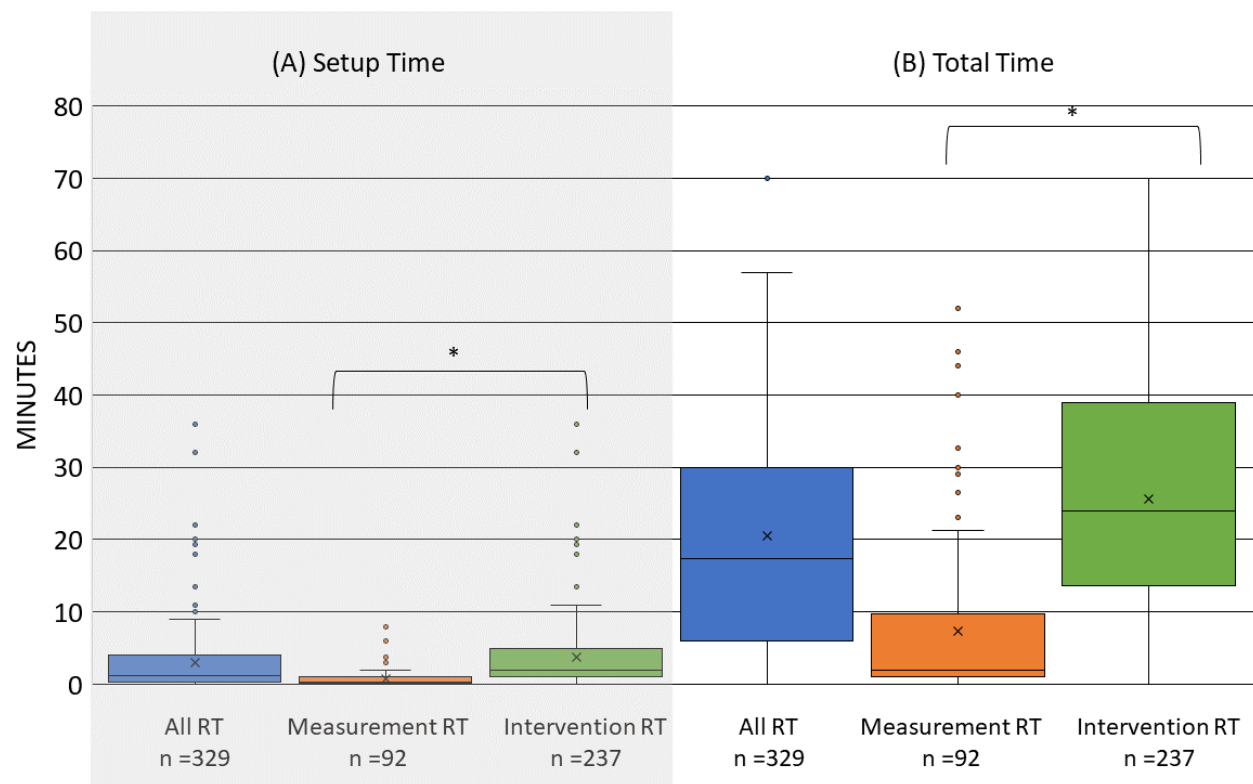

**Table 1: Qualitative and quantitative data collected in field observations and inventory.** Table includes the type of data collected, distinguishes each variable, and provides an example.

| Data        | Type                                                                            | Variable                                                      | Example                                                                           |
|-------------|---------------------------------------------------------------------------------|---------------------------------------------------------------|-----------------------------------------------------------------------------------|
| Qualitative | Descriptive leading to inductive coding                                         | Name of the device inventoried, or observed used by clinician | Treadmills, Mobile Arm Supports, Vital Machines                                   |
|             |                                                                                 | Assign a category behind purpose of device use                | Measurement of UE/LE/Vitals, Intervention for-strength/endurance                  |
|             |                                                                                 | Description of task or therapeutic activity                   | Standing, walking, biking, blood pressure measurement                             |
|             |                                                                                 | General observational notes in free text                      | <i>“Therapist retrieves equipment for next task during patient's rest breaks”</i> |
|             | Initially descriptive, leading to coding became categorical as the observations | Therapist feedback provided to patient when using device      | Knowledge of results, Knowledge of performance                                    |

|              |             |                                                                                                        |                                                                               |
|--------------|-------------|--------------------------------------------------------------------------------------------------------|-------------------------------------------------------------------------------|
|              | continued   |                                                                                                        |                                                                               |
|              | Categorical | Clinician being observed                                                                               | OT, PT, SLP                                                                   |
|              |             | Group type                                                                                             | One-on-One, Double, Group (≥3)                                                |
|              |             | If the patient is a first-time user to the device based on observation of interaction and instructions | Yes, No, or unclear                                                           |
|              |             | Type of cues and instruction provided by therapist                                                     | Verbal, demonstration                                                         |
|              |             | Therapist's ongoing attention to patient using device, versus therapist multi-tasking during treatment | Point of care documentation, direct care                                      |
|              |             | Hospital floor/unit where therapy took place                                                           | 25 <sup>th</sup> Floor Inpatient hospital, DayRehab <sup>®</sup> , Outpatient |
| Quantitative | Continuous  | Length of time to setup, train, and/or instruct patient on device use                                  | Time                                                                          |

**Table 2: Characteristics of clinicians, treatments, and rehabilitation technologies (RT) observed used in field observations.** Table includes definitions, counts, and percentages by category and sub-category, separated by type and total.

| Category                  | Sub-Category     | Definition                                                   | Intervention<br>RT<br>(237, 72%) | Measurement<br>RT<br>(92, 28%) | Total<br>(329) |
|---------------------------|------------------|--------------------------------------------------------------|----------------------------------|--------------------------------|----------------|
| <b>Clinician<br/>Type</b> | OT               | Occupational Therapists                                      | 56 (24%)                         | 14 (15%)                       | 70 (21%)       |
|                           | PT               | Physical Therapists                                          | 173 (73%)                        | 73 (79%)                       | 246 (75%)      |
|                           | Not Documented   | --                                                           | 8 (3%)                           | 5 (5%)                         | 13 (4%)        |
| <b>Treatment<br/>Type</b> | One On One       | Clinician working with 1 patient                             | 169 (71%)                        | 78 (85%)                       | 247 (76%)      |
|                           | Double           | Clinician working with 2 patients simultaneously             | 20 (8%)                          | 1 (1%)                         | 21 (6%)        |
|                           | Group            | Clinician working with 3 or more patients simultaneously     | 13 (5%)                          | 1 (1%)                         | 14 (4%)        |
|                           | Not Documented   | --                                                           | 35 (15%)                         | 12 (13%)                       | 47 (14%)       |
| <b>Power<br/>Source</b>   | Electrical Power | Powered by alternating current (e.g., wall plug/electricity) | 183 (77%)                        | 1 (1%)                         | 184 (56%)      |

|                       |                 |                                                                                                                                   |           |          |           |
|-----------------------|-----------------|-----------------------------------------------------------------------------------------------------------------------------------|-----------|----------|-----------|
|                       | Battery Powered | RT powered by a battery source, also includes rechargeable batteries; or does not remain plugged into a wall outlet to be powered | 19 (8%)   | 81 (88%) | 100 (30%) |
|                       | Unpowered       | No source of power; or uses cables, pullies, or pneumatics to operate                                                             | 35 (15%)  | 10 (11%) | 45 (14%)  |
| <b>Smart RT</b>       | Actuated        | Powered RT, motor, moves                                                                                                          | 185 (78%) | 1 (1%)   | 186 (57%) |
|                       | Unactuated      | Typically unpowered, does not move                                                                                                | 52 (22%)  | 91 (99%) | 143 (43%) |
| <b>Display</b>        | Monitor         | Visual display screen                                                                                                             | 75 (32%)  | 81 (88%) | 156 (47%) |
|                       | No Monitor      | No visual display screen                                                                                                          | 162 (68%) | 11 (12%) | 173 (53%) |
| <b>Versatility</b>    | Multi-Use Tool  | RT that can be used for multiple types of interventions, and/or measurements.                                                     | 222 (94%) | 2 (2%)   | 224 (68%) |
|                       | Single-Use Tool | RT that serves only one function                                                                                                  | 15 (6%)   | 90 (98%) | 105 (32%) |
| <b>Training Level</b> | Entry-Level     | Taught in clinical schools, no additional training beyond OT/PT degree                                                            | 109 (46%) | 78 (85%) | 187 (57%) |
|                       | Short           | 1-2 hours of additional training                                                                                                  | 111 (47%) | 10 (11%) | 121 (37%) |



|  |         |                                                                                 |         |        |         |
|--|---------|---------------------------------------------------------------------------------|---------|--------|---------|
|  | Complex | ≥ 1 day of additional training, or requires certification to achieve competency | 17 (7%) | 4 (4%) | 21 (6%) |
|--|---------|---------------------------------------------------------------------------------|---------|--------|---------|
